# Supplementary material
Source: publisher figshare collection journal article supplement (https://gsapubs.figshare.com/ndownloader/files/31266865)
Supplement: Supplementary file 1 [file 31266865]

## Sheet: S1
TABLE S1. REMOVED CHECK DAMS AND ROADS
Watershed Name	Dam ID	UTM East	UTM North
Arroyo Secco	AS D1	391182	3.78915e+06
Arroyo Secco	AS D2	397158	3.7923e+06
Arroyo Secco	AS D3	397214	3.79219e+06
Arroyo Secco	AS D4	397200	3.79218e+06
Arroyo Secco	AS D5	397126	3.79179e+06
Arroyo Secco	AS D6	396806	3.79194e+06
Arroyo Secco	AS D7	396784	3.79191e+06
Arroyo Secco	AS D8	396632	3.79184e+06
Arroyo Secco	AS D9	396488	3.79191e+06
Arroyo Secco	AS D10	396282	3.79201e+06
Arroyo Secco	AS D11	396056	3.79203e+06
Arroyo Secco	AS D12	395850	3.79213e+06
Arroyo Secco	AS D13	395486	3.79217e+06
Arroyo Secco	AS D14	395286	3.79226e+06
Arroyo Secco	AS D15	394892	3.79232e+06
Arroyo Secco	AS D16	397548	3.79158e+06
Arroyo Secco	AS D17	397420	3.79161e+06
Arroyo Secco	AS D18	397226	3.79166e+06
Arroyo Secco	AS D19	396960	3.79176e+06
Arroyo Secco	AS D20	397092	3.79146e+06
Clear Creek	CL D1	392990	3.7929e+06
Dunsmore Canyon	D D1	385410	3.7912e+06
El Prieto Canyon	EL D1	394010	3.7876e+06
El Prieto Canyon	EL D2	393968	3.78746e+06
El Prieto Canyon	EL D3	393876	3.78719e+06
El Prieto Canyon	EL D4	393766	3.78723e+06
El Prieto Canyon	EL D5	393476	3.78715e+06
El Prieto Canyon	EL D6	393350	3.7872e+06
El Prieto Canyon	EL D7	393236	3.78711e+06
El Prieto Canyon	EL D8	393128	3.78697e+06
El Prieto Canyon	EL D9	392974	3.78697e+06
El Prieto Canyon	EL D10	392862	3.78678e+06
El Prieto Canyon	EL D11	392792	3.78667e+06
El Prieto Canyon	EL D12	392688	3.78654e+06
El Prieto Canyon	EL D13	392530	3.78638e+06
Fern Canyon	FE D1	392816	3.78807e+06
Fern Canyon	FE D2	392694	3.78799e+06
Fern Canyon	FE D3	392118	3.78672e+06
Fern Canyon	FE D4	392108	3.78673e+06
Fern Canyon	FE D5	392088	3.78663e+06
Fern Canyon	FE D6	391956	3.78651e+06
Little Santa Anita Wash	LSA D1	403896	3.78218e+06
Little Santa Anita Wash	LSA D2	403828	3.78186e+06
Millard Creek	M D1	392930	3.7861e+06
Pasadena Canyon	PA D1	400560	3.78267e+06
Pasadena Canyon	PA D2	400558	3.78266e+06
Pasadena Canyon	PA D3	400570	3.78259e+06
Pasadena Canyon	PA D4	400568	3.78237e+06
Sutton Canyon	SU D1	387324	3.78968e+06
Sutton Canyon	SU D2	387294	3.78951e+06
Sutton Canyon	SU D3	387212	3.78932e+06
Sutton Canyon	SU D4	387192	3.78929e+06
Sutton Canyon	SU D5	387142	3.79052e+06
Sutton Canyon	SU D6	387160	3.79044e+06
Sutton Canyon	SU D7	387230	3.79013e+06
Sutton Canyon	SU D8	387324	3.79001e+06

## Sheet: S2
TABLE S2. CYCLIC STEP EXPERIMENTAL DATA
Slope*	LU**	Hwf#	Hwf / LU
	(m)	(m)
Brooks (2001)
0.161	0.521	0.043	0.0825336
0.204	0.518	0.049	0.0945946
0.244	0.258	0.035	0.135659
0.292	0.193	0.04	0.207254
0.148	0.393	0.028	0.0712468
0.154	0.403	0.056	0.138958
0.157	0.267	0.036	0.134831
0.195	0.312	0.033	0.105769
0.201	0.265	0.045	0.169811
0.247	0.27	0.037	0.137037
0.247	0.265	0.047	0.177358
0.25	0.32	0.046	0.14375
0.294	0.408	0.057	0.139706
0.362	0.311	0.07	0.22508
0.152	0.275	0.031	0.112727
0.2	0.294	0.038	0.129252
0.253	0.295	0.056	0.189831
0.254	0.374	0.063	0.168449
0.299	0.343	0.079	0.230321
0.297	0.359	0.073	0.203343
Ashida and Sawai (1977)
0.225	0.089	0.0093	0.104494
0.225	0.063	0.0097	0.153968
0.225	0.055	0.0115	0.209091
0.438	0.036	0.0034	0.0944444
0.438	0.044	0.0079	0.179545
0.438	0.047	0.0096	0.204255
0.707	0.042	0.0058	0.138095
0.707	0.026	0.0058	0.223077
0.545	0.063	0.0214	0.339683
0.555	0.15	0.06	0.4
0.196	0.14	0.01	0.0714286
Koyama and Ikeda (1998)
0.05	0.8267	0.0043	0.0052014
0.11	0.2255	0.0057	0.0252772
0.18	0.1676	0.0114	0.0680191
0.27	0.1442	0.025	0.17337
0.36	0.2583	0.0407	0.157569
0.47	0.159	0.0321	0.201887
0.58	0.2255	0.0657	0.291353
0.7	0.1192	0.0314	0.263423
0.84	0.155	0.0379	0.244516
1	0.1265	0.0243	0.192095
1.19	0.1228	0.0579	0.471498
1.43	0.1378	0.03	0.217707
0.11	0.1722	0.0043	0.024971
0.36	0.1078	0.0057	0.0528757
0.84	0.1265	0.0121	0.0956522
0.11	0.157	0.0071	0.0452229
0.36	0.1363	0.015	0.110051
0.84	0.1632	0.015	0.0919118
0.11	0.159	0.005	0.0314465
0.36	0.1476	0.0157	0.106369
0.84	0.1409	0.0186	0.132009
Scheingross et al. (2019)
0.195	0.371955	0.149136	0.400953
Taki and Parker (2005)
0.0403	1.3	0.032	0.0246154
0.0374	0.75	0.039	0.052
0.028	1.35	0.04	0.0296296
0.039	1.07	0.039	0.0364486
0.0455	0.99	0.041	0.0414141
0.061	0.64	0.026	0.040625
0.048	0.63	0.034	0.0539683
0.0539	0.57	0.05	0.0877193
0.0598	0.74	0.032	0.0432432
0.0459	0.95	0.024	0.0252632
0.059	0.65	0.031	0.0476923
0.0509	0.79	0.03	0.0379747
0.039	1.02	0.02	0.0196078
0.086	1.24	0.022	0.0177419
0.088	1.2	0.03	0.025
Yokokawa et al. (2016)
0.0874887	0.45	0.03195	0.071
0.0874887	0.575	0.0161	0.028
0.0874887	0.365	0.0292	0.08
0.36397	0.45	0.04005	0.089
0.0874887	1.25	0.0225	0.018
0.0874887	0.473	0.036894	0.078
0.36397	0.343	0.060711	0.177
Note: Each line is a separate experimental run with averaged values for that experiment.
*Slope represents the slope at wich the flume was tilted.
**LU is the waterfall unit length which was measured from hydraulic jump to hydraulic jump then averaged for each experimental run.
#Hwf is the waterfall height averaged for each experimental run.

## Sheet: S3
TABLE S3. FIELD SURVEY FROM RUBY MOUNTAINS, NV CYCLIC STEP METRICS
Survey #	Section #*	Average slope of section**	Step #	Pool length#	Step height
		(degrees)		(cm)	(cm)
1	1	27.1429	1	22	10
1	1	27.1429	2	13.5	15
1	1	27.1429	3	20.5	11.5
1	1	27.1429	4	20	13.5
1	1	27.1429	5	19.5	19
1	1	27.1429	6	14.5	10
1	1	27.1429	7	15	7
1	1	27.1429	8	11.5	10.5
1	1	27.1429	9	14.5	10
1	2	15.7143	1	16.5	12
1	2	15.7143	2	18.5	7
1	2	15.7143	3	25.5	10.5
1	2	15.7143	4	34	7
1	3	6.2	1	35	5
1	3	6.2	2	39	5.5
1	3	6.2	3	50	4
1	3	6.2	4	64	2
2	1	9.375	1	57.5	15.5
2	1	9.375	2	70	17
2	1	9.375	3	64	6.5
2	1	9.375	4	61	12.5
3	1	36	1	25.5	24
3	1	36	2	28	12
3	1	36	3	12	22
3	1	36	4	15	12
3	1	36	5	11	17
3	1	36	6	8	13
3	1	36	7	17	27
3	1	36	8	20	23
3	1	36	9	21	24
4	1	19.4	1	27	14
4	1	19.4	2	46	15
4	1	19.4	3	19.5	12
4	2	24	1	50	42
4	2	24	2	15	16.5
4	2	24	3	13	17
4	3	46.5	1	21	22.5
4	3	46.5	2	20	26
4	3	46.5	3	28	80
5	1	15.4	1	38	19
5	1	15.4	2	39	16.5
5	1	15.4	3	27	8
5	1	15.4	4	50	11
5	1	15.4	5	17.5	14
5	2	30	1	26	17
5	2	30	2	22	26
5	2	30	3	31	34
5	2	30	4	16.5	26.5
5	2	30	5	15	10
5	3	33	1	37	34
5	3	33	2	48	13
5	3	33	3	20	36
6	1	27.2	1	22	12
6	1	27.2	2	26	26.5
6	1	27.2	3	51	22
6	1	27.2	4	42	21
6	1	27.2	5	24	16
7	1	33.5	1	14.5	9.5
7	1	33.5	2	8	12.5
7	1	33.5	3	8.5	13
8	1	19.1667	1	18	7
8	1	19.1667	2	21	5
8	1	19.1667	3	14.5	8
8	1	19.1667	4	11.5	8
8	1	19.1667	5	15	8.5
8	1	19.1667	6	30.5	5
8	1	19.1667	7	16	6.5
8	1	19.1667	8	21	9
8	1	19.1667	9	22	10
8	2	15.5	1	27	8.5
8	2	15.5	2	24.5	4
8	2	15.5	3	8.5	9
8	2	15.5	4	12	7
8	2	15.5	5	38	24
8	2	15.5	6	40	14.5
8	2	15.5	7	35	15
8	2	15.5	8	29	70
9	1	16.8333	1	24	8.5
9	1	16.8333	2	15	7
9	1	16.8333	3	7.5	3.5
9	1	16.8333	4	8	6.5
9	1	16.8333	5	14	5
9	1	16.8333	6	13.5	6
9	1	16.8333	7	14	5
9	2	10	1	15	5
9	2	10	2	20	5
9	2	10	3	20	2.5
9	2	10	4	19.5	6.5
9	3	26.1667	1	14	18
9	3	26.1667	2	40	35
9	3	26.1667	3	41	33
9	3	26.1667	4	16.5	8.5
9	4	23.5	1	16	13
9	4	23.5	2	30	4.5
9	4	23.5	3	14	14
9	4	23.5	4	23	18
9	4	23.5	5	32	9
9	5	7.4	1	52	8
9	5	7.4	2	33	17
9	5	7.4	3	38	4.5
9	5	7.4	4	22	5
9	5	7.4	5	70	10.5
9	6	20.7143	1	39	17
9	6	20.7143	2	24	15.5
9	6	20.7143	3	27	14
9	6	20.7143	4	28	10.5
9	6	20.7143	5	10	6
9	6	20.7143	6	18	11
Note: Location of hillslope for surveys is 40.3030726,-115.5089211
*Surveys were split into sections where the slope changed within a group of steps.
**Slope was measured across the length of steps and across the hillslope beside the steps then averaged.
#Pool length was used as a proxy for the waterfall unit length and was measured from the base of the upstream step to the lip of the downstream step.

## Sheet: S4
TABLE S4. SAN GABRIEL MOUTAINS, CA WATERFALL METRICS
Watershed Name	Waterfall ID	UTM East	UTM North	XL*	XB**	ZL#	ZB##	Drainage Area	Non-Dimensional Distance###	SR*#	SU**#	LU+	Hwf++
				(m)	(m)	(m)	(m)	(km2)				(m)	(m)
Arroyo Secco	AS1	396852	3.78923e+06	20909.1	20906.6	1217.77	1216.23	1.66208	0.950999	N.D.	N.D.	N.D.	N.D.
Arroyo Secco	AS2	395544	3.78965e+06	18682.2	18680.2	1005.58	1003.73	4.43207	0.849717	0.0946957	0.0954444	2226.42	1.85626
Arroyo Secco	AS3	395518	3.78964e+06	18637	18634.6	998.724	997.126	4.43377	0.84766	0.11578	0.144676	45.6274	1.59796
Arroyo Secco	AS4	392984	3.79022e+06	12533.9	12530.9	698.159	695.322	24.2667	0.570075	0.0490055	0.0494461	6103.69	2.8363
Arroyo Secco	AS5	391184	3.78915e+06	5586.97	5580.14	526.76	512.695	36.9199	0.25411	0.0242748	0.0262744	6950.76	14.0643
Arroyo Secco	AS6	397196	3.79218e+06	23847	23835	1250.22	1242.18	1.5508	0.982999	N.D.	N.D.	N.D.	N.D.
Arroyo Secco	AS7	396800	3.79193e+06	22782.8	22757.4	1175.63	1159.87	1.70584	0.939134	0.0632598	0.0763899	1077.53	15.7539
Arroyo Secco	AS8	395720	3.79315e+06	21919.5	21917.5	1182.67	1181.1	1.06362	0.987976	N.D.	N.D.	N.D.	N.D.
Arroyo Secco	AS9	395624	3.79307e+06	21728	21723.6	1163.31	1156.48	1.59043	0.979343	0.0938582	0.126939	193.953	6.83044
Arroyo Secco	AS10	395630	3.79306e+06	21707.3	21704.4	1155.19	1153.55	1.5924	0.978409	0.0793913	0.153355	19.1421	1.64038
Arroyo Secco	AS11	395654	3.79303e+06	21665.2	21662.2	1149.09	1146.74	1.59608	0.976514	0.113665	0.161346	42.2132	2.35376
Arroyo Secco	AS12	395646	3.79302e+06	21650.3	21646.5	1143.4	1140.16	1.59665	0.975842	0.280302	0.418501	15.7279	3.2467
Arroyo Secco	AS13	395558	3.79294e+06	21492.7	21490.3	1125.97	1123.89	1.61213	0.968738	0.0922756	0.104145	156.196	2.07666
Arroyo Secco	AS14	395568	3.79296e+06	21464.9	21462.9	1121.88	1119.06	1.61284	0.967485	0.079124	0.176267	27.3848	2.81848
Arroyo Secco	AS15	395460	3.79288e+06	21251.8	21249.4	1100.35	1098.42	1.639	0.957879	0.0886141	0.0966782	213.551	1.93604
Arroyo Secco	AS16	395466	3.79286e+06	21224.5	21222.1	1096.36	1094.45	1.64045	0.956647	0.0826369	0.145066	27.3137	1.90466
Arroyo Secco	AS17	395326	3.79276e+06	20961.7	20959.7	1074.67	1072.82	2.62743	0.944802	0.0759799	0.0824409	262.392	1.84729
Arroyo Secco	AS18	395614	3.79114e+06	18118.9	18113.9	1129.19	1121.87	1.09975	0.997223	N.D.	N.D.	N.D.	N.D.
Arroyo Secco	AS19	395606	3.79115e+06	18105.2	18097.4	1119.99	1111.63	1.10049	0.996471	0.216591	0.621352	16.4853	8.36816
Arroyo Secco	AS20	395582	3.79114e+06	18073.2	18069.2	1108.58	1105.05	1.20903	0.994712	0.126079	0.23369	28.1421	3.53271
Arroyo Secco	AS21	395564	3.79113e+06	18050.9	18047.5	1102.57	1099.11	1.21027	0.993484	0.135123	0.273451	21.7279	3.46692
Arroyo Secco	AS22	395520	3.79111e+06	17995.5	17992.5	1090.27	1088.17	1.22003	0.990432	0.169814	0.198724	55.0416	2.10071
Arroyo Secco	AS23	395444	3.79112e+06	17908.9	17905.4	1071.5	1068.95	1.27246	0.985665	0.199431	0.220846	87.0122	2.54431
Arroyo Secco	AS24	395428	3.79112e+06	17888.1	17884.1	1067.05	1063.79	1.27363	0.984525	0.109903	0.242208	21.3137	3.25952
Arroyo Secco	AS25	395392	3.79113e+06	17840.1	17836.7	1055.53	1053.35	1.35127	0.98188	0.187567	0.219975	47.4558	2.17834
Arroyo Secco	AS26	395360	3.79115e+06	17795.9	17792.5	1042.97	1040.14	1.35427	0.979447	0.254367	0.298792	44.2132	2.83264
Arroyo Secco	AS27	394508	3.79093e+06	16601.4	16599.4	871.679	869.519	2.24098	0.913705	0.141438	0.143011	1193.07	2.15936
Arroyo Secco	AS28	394196	3.79071e+06	16026.1	16023.7	811.959	809.721	2.49952	0.88204	0.100397	0.103863	575.742	2.23816
Arroyo Secco	AS29	394182	3.79071e+06	16008.6	16006.2	807.637	806.08	2.50116	0.881078	0.138249	0.208211	17.4853	1.55707
Arroyo Secco	AS30	393896	3.7903e+06	15386.6	15379.9	822.545	817.768	1.10872	0.988024	N.D.	N.D.	N.D.	N.D.
Arroyo Secco	AS31	393886	3.79031e+06	15373.7	15368.9	814.82	811.345	1.10887	0.987195	0.472206	0.580197	11.0711	3.47559
Arroyo Secco	AS32	393888	3.79032e+06	15359.8	15340.5	807.536	781.819	1.11004	0.986303	0.419922	1.04021	28.3848	25.7169
Arroyo Secco	AS33	392176	3.79154e+06	10823.6	10820.6	746.514	743.338	1.02873	0.993649	N.D.	N.D.	N.D.	N.D.
Arroyo Secco	AS34	392172	3.79153e+06	10817.7	10814.3	742.136	738.487	1.02887	0.993114	0.424894	0.777009	6.24264	3.6488
Arroyo Secco	AS35	392160	3.79151e+06	10787.8	10782.5	735.091	727.644	1.17611	0.990362	0.127888	0.341005	31.799	7.44739
Arroyo Secco	AS36	391994	3.79113e+06	10250.7	10247.3	678.312	675.813	1.40721	0.941059	0.0927645	0.0968408	535.215	2.49841
Arroyo Secco	AS37	391666	3.79071e+06	9446.22	9436.57	609.197	598.754	3.92993	0.867202	0.0831565	0.095047	810.749	10.4432
Arroyo Secco	AS38	390672	3.79111e+06	10315.5	10312.5	740.755	738.403	1.3889	0.995964	N.D.	N.D.	N.D.	N.D.
Arroyo Secco	AS39	390694	3.79109e+06	10226.5	10224.5	727.099	724.938	1.43123	0.98738	0.131578	0.153174	87.9117	2.16168
Arroyo Secco	AS40	390720	3.79108e+06	10172.6	10169.2	721.688	717.355	1.434	0.982172	0.0625579	0.136981	55.3553	4.33331
Arroyo Secco	AS41	390878	3.79096e+06	9847.35	9843.94	690.499	687.642	1.56647	0.950769	0.0834462	0.0913539	325.25	2.85687
Arroyo Secco	AS42	391278	3.79064e+06	9057.43	9055.02	636.05	634.364	1.83223	0.874501	0.0655961	0.0675325	788.921	1.68604
Arroyo Secco	AS43	391414	3.79054e+06	8815.26	8812.84	617.942	615.897	1.85825	0.851119	0.068493	0.0762545	242.179	2.04504
Arroyo Secco	AS44	391436	3.79054e+06	8783.04	8780.63	611.787	610.122	1.86039	0.848009	0.137932	0.179283	32.2132	1.66504
Arroyo Secco	AS45	391482	3.79052e+06	8715.93	8713.93	606.082	603.467	1.86338	0.841529	0.0624422	0.0997696	66.6985	2.61456
Arroyo Secco	AS46	391476	3.79048e+06	8662.47	8658.64	599.542	591.115	1.8657	0.836368	0.0762847	0.223442	55.2843	8.42755
Arroyo Secco	AS47	391466	3.79046e+06	8636.75	8634.75	588.45	586.835	1.86642	0.833884	0.121677	0.179069	23.8995	1.61499
Arroyo Secco	AS48	391480	3.79045e+06	8612.43	8608.43	584.491	580.6	1.86734	0.831536	0.105025	0.236962	26.3137	3.89185
Arroyo Secco	AS49	391834	3.79086e+06	9781.1	9778.1	675.53	672.895	1.05859	0.955413	N.D.	N.D.	N.D.	N.D.
Arroyo Secco	AS50	391834	3.79085e+06	9773.27	9763.44	672.215	650.324	1.05872	0.954649	0.140869	1.54001	14.6569	21.8915
Arroyo Secco	AS51	391832	3.79083e+06	9748.79	9741.37	649.122	639.395	1.05977	0.952257	0.0819987	0.495163	22.0711	9.72693
Arroyo Secco	AS52	391832	3.7908e+06	9711.06	9701.64	636.843	629.257	1.0629	0.948572	0.0841703	0.255173	39.7279	7.586
Arroyo Secco	AS53	391854	3.78897e+06	5361.04	5355.21	548.843	543.357	1.27497	0.940109	N.D.	N.D.	N.D.	N.D.
Arroyo Secco	AS54	391702	3.78894e+06	5140.83	5137.41	526.609	522.918	1.54215	0.901493	0.078127	0.093846	217.794	3.69025
Bailey Canyon	BA1	402244	3.78268e+06	1120.8	1118.38	513.584	511.468	1.00301	0.976708	N.D.	N.D.	N.D.	N.D.
Bailey Canyon	BA2	402242	3.78268e+06	1115.56	1106.9	510.403	499.116	1.00326	0.97214	0.376654	1.0755	11.4853	11.2871
Bailey Canyon	BA3	402232	3.78267e+06	1099.66	1095.24	498.54	493.483	1.00407	0.958284	0.0795275	0.483185	11.6569	5.05643
Bailey Canyon	BA4	402196	3.78264e+06	1051.54	1047.71	486.681	481.601	1.05497	0.916357	0.155665	0.250009	47.5269	5.07986
Bailey Canyon	BA5	402204	3.78259e+06	978.288	974.874	469.208	465.595	1.09425	0.85252	0.1785	0.219745	72.8406	3.61371
Bailey Canyon	BA6	402208	3.78256e+06	950.561	947.732	462.638	460.678	1.096	0.828356	0.121582	0.181146	27.1421	1.96057
Bailey Canyon	BA7	402156	3.78248e+06	835.335	831.921	450.895	444.601	1.12878	0.727944	0.0870383	0.138822	115.811	6.29428
Bailey Canyon	BA8	402130	3.78245e+06	790.222	785.394	440.159	431.084	1.1314	0.688631	0.106533	0.290506	46.5269	9.07407
Bryant Canyon	BR1	383048	3.79491e+06	1644.93	1641.1	694.765	692.492	1.31355	0.713561	N.D.	N.D.	N.D.	N.D.
Bryant Canyon	BR2	383038	3.79491e+06	1634.27	1632.27	691.869	689.41	1.3141	0.708938	0.091252	0.349103	8.82843	2.45892
Bryant Canyon	BR3	383008	3.79491e+06	1601.37	1597.96	686.063	682.645	1.3218	0.694667	0.108305	0.197156	34.3137	3.41858
Clear Creek	CL1	392990	3.79294e+06	5171.12	5165.88	1020.64	1015.91	1.33913	0.950045	N.D.	N.D.	N.D.	N.D.
Clear Creek	CL2	392722	3.79288e+06	4840.8	4838.39	985.262	983.216	1.37019	0.889358	0.0942885	0.0998394	327.492	2.04553
Clear Creek	CL3	392656	3.79295e+06	4696.92	4693.92	970.031	967.676	1.92704	0.862924	0.0931995	0.107564	144.468	2.3548
Clear Creek	CL4	392500	3.79319e+06	4224.3	4220.3	930.59	925.549	2.8249	0.776094	0.0789707	0.088949	473.617	5.04181
Clear Creek	CL5	391482	3.79345e+06	2807.58	2804.17	810.455	806.243	4.9452	0.515812	0.0814696	0.0842475	1416.14	4.2121
Clear Creek	CL6	390642	3.79387e+06	1338.04	1335.62	715.225	713.415	7.02974	0.245826	0.06208	0.0632103	1468.55	1.80981
Clear Creek	CL7	390428	3.79386e+06	1061.69	1058.69	692.588	690.234	7.14555	0.195054	0.0760301	0.0837058	276.936	2.35376
Coldwater Canyon	COL1	397308	3.79687e+06	265.108	263.108	974.269	972.42	1.89979	0.143915	N.D.	N.D.	N.D.	N.D.
Cooks Canyon Channel	CO1	384482	3.7909e+06	561.056	558.642	752.976	748.799	1.23445	0.468916	N.D.	N.D.	N.D.	N.D.
Cooks Canyon Channel	CO2	384384	3.79087e+06	428.517	425.103	735.149	731.004	1.27817	0.358143	0.104901	0.13326	133.539	4.1452
Cooks Canyon Channel	CO3	384296	3.7909e+06	293.149	290.149	721.126	717.622	1.31603	0.245006	0.0748625	0.0991581	134.953	3.50336
Cooks Canyon Channel	CO4	384136	3.79081e+06	66.8701	63.8701	703.16	700.358	1.41812	0.0558882	0.0647705	0.076295	226.279	2.80206
Eaton Wash	EA1	399508	3.78798e+06	10486.2	10483.8	1116.25	1114.24	1.31455	0.943661	N.D.	N.D.	N.D.	N.D.
Eaton Wash	EA2	399508	3.78793e+06	10430.5	10425.2	1105.66	1100.83	1.63083	0.938648	0.161025	0.229099	58.5269	4.82837
Eaton Wash	EA3	399596	3.78774e+06	10181.7	10179.7	1071.02	1069.31	1.79403	0.916255	0.122371	0.128363	245.593	1.71655
Eaton Wash	EA4	400050	3.78684e+06	8863.63	8861.63	927.584	925.83	2.49297	0.797645	0.107689	0.108856	1318.02	1.75311
Eaton Wash	EA5	400102	3.78589e+06	7543.34	7540.92	807.953	805.797	7.41254	0.678831	0.0894168	0.0908855	1320.71	2.15564
Eaton Wash	EA6	399632	3.78529e+06	6112.82	6109.4	705.04	702.323	12.528	0.550097	0.0705531	0.0722829	1431.52	2.71704
Eaton Wash	EA7	399544	3.78531e+06	6002.59	5999.76	696.169	694.192	12.5577	0.540178	0.0576076	0.074161	109.64	1.97784
Eaton Wash	EA8	399540	3.78531e+06	5997.76	5995.76	693.708	691.911	12.5593	0.539743	0.241821	0.570282	4	1.79749
Eaton Wash	EA9	399440	3.78535e+06	5829.32	5826.91	680.544	678.01	12.5803	0.524586	0.0682903	0.0823261	168.853	2.53485
Eaton Wash	EA10	399406	3.78542e+06	5715.61	5708.78	668.914	661.591	12.66	0.514353	0.0817223	0.138991	118.125	7.32294
Eaton Wash	EA11	399382	3.78541e+06	5667.33	5664.91	657.365	655.164	12.7067	0.510007	0.101937	0.146505	43.8701	2.20129
Eaton Wash	EA12	399372	3.78539e+06	5640.36	5632.12	653.181	641.224	12.7081	0.50758	0.0807444	0.425006	32.799	11.957
Eaton Wash	EA13	399346	3.78538e+06	5605.39	5603.39	638.744	637.025	12.7115	0.504433	0.0927998	0.146174	28.7279	1.71893
Eaton Wash	EA14	399070	3.78474e+06	4468.2	4465.2	569.81	567.792	14.8828	0.402097	0.0592109	0.0608278	1138.18	2.01807
Eaton Wash	EA15	399006	3.78487e+06	4270.41	4268.41	553.856	551.282	14.9211	0.384298	0.0715412	0.0838912	196.794	2.57349
Eaton Wash	EA16	398970	3.78493e+06	4192.33	4189.91	546.181	543.972	14.9413	0.377271	0.0670484	0.0931349	78.4975	2.20959
Eaton Wash	EA17	398748	3.78482e+06	3739.57	3737.57	518.286	516.162	15.1493	0.336527	0.0570363	0.0614795	452.345	2.1239
Eaton Wash	EA18	398442	3.78483e+06	3110.91	3108.5	486.245	484.484	15.752	0.279954	0.0477398	0.0503567	629.068	1.76147
Eaton Wash	EA19	398370	3.78476e+06	2940.2	2933.2	473.867	462.302	15.938	0.264591	0.0630835	0.12654	175.296	11.5653
Eaton Wash	EA20	398426	3.7845e+06	2202.61	2196.19	426.88	414.358	16.2452	0.198215	0.0484842	0.0650524	737.009	12.5219
Eaton Wash	EA21	399058	3.78693e+06	9959.79	9956.79	1084.14	1082.12	1.96367	0.945941	N.D.	N.D.	N.D.	N.D.
Eaton Wash	EA22	399442	3.78656e+06	8960.15	8958.15	994.195	992.24	2.46796	0.851	0.0882266	0.0900074	998.632	1.95483
Eaton Wash	EA23	399832	3.78613e+06	7935.21	7931.21	903.251	899.327	2.82181	0.753655	0.0869924	0.0904753	1026.95	3.92468
Eaton Wash	EA24	399780	3.78598e+06	7700.2	7695.79	882.245	877.488	2.86295	0.731335	0.0739443	0.092765	235.421	4.7572
Eaton Wash	EA25	399788	3.78597e+06	7688.96	7686.55	876.279	874.526	2.91269	0.730267	0.177007	0.320495	9.24264	1.75354
Eaton Wash	EA26	399862	3.78591e+06	7561.01	7559.01	857.166	854.8	2.94172	0.718114	0.138283	0.154664	127.539	2.36591
Eaton Wash	EA27	399886	3.7859e+06	7527.04	7524.62	851.356	849.799	2.94625	0.714888	0.107721	0.145422	34.3848	1.5564
Eaton Wash	EA28	399910	3.78591e+06	7497.07	7494.07	847.027	844.112	2.94934	0.712041	0.100597	0.18612	30.5563	2.91504
Eaton Wash	EA29	399952	3.7859e+06	7447.44	7439.78	836.233	822.523	2.95403	0.707328	0.168988	0.397709	54.2843	13.7099
Eaton Wash	EA30	399982	3.78588e+06	7408.4	7403.57	815.787	809.565	2.96115	0.70362	0.214613	0.357834	36.2132	6.22272
Eaton Wash	EA31	399992	3.78587e+06	7391.67	7387.84	808.222	804.42	2.96574	0.702031	0.112843	0.327119	15.7279	3.80212
Eaton Wash	EA32	400002	3.78585e+06	7368.11	7366.11	802.021	800.31	2.9681	0.699794	0.121591	0.189151	21.7279	1.71112
Eaton Wash	EA33	400008	3.78584e+06	7355.63	7353.63	799.091	797.363	2.9689	0.698608	0.116293	0.236015	12.4853	1.72736
Eaton Wash	EA34	400012	3.78583e+06	7344.38	7342.38	797.061	795.166	2.9695	0.69754	0.0327145	0.19544	11.2426	1.8949
Eaton Wash	EA35	400850	3.78621e+06	9148.11	9145.11	1009.53	1007.38	1.55399	0.946811	N.D.	N.D.	N.D.	N.D.
Eaton Wash	EA36	400866	3.78619e+06	9116.14	9113.72	1002.69	1000.86	1.55697	0.943502	0.162019	0.207943	31.3848	1.83246
Eaton Wash	EA37	400762	3.78617e+06	8798.53	8795.53	965.035	962.397	1.69844	0.910631	0.113649	0.120869	318.191	2.63806
Eaton Wash	EA38	400562	3.7862e+06	8462.24	8457.24	929.586	924.416	1.73457	0.875825	0.0984466	0.112275	338.291	5.17029
Eaton Wash	EA39	400534	3.78626e+06	8369.23	8367.23	913.14	911.34	1.88298	0.866198	0.128114	0.145267	90.0122	1.80023
Eaton Wash	EA40	400460	3.78626e+06	8264.42	8262	899.771	897.854	1.91282	0.855351	0.112529	0.128164	105.225	1.91681
Eaton Wash	EA41	400458	3.78625e+06	8253.76	8250.35	896.775	893.124	1.91341	0.854248	0.130836	0.405716	11.6569	3.65094
Eaton Wash	EA42	400370	3.78615e+06	8078.52	8075.52	876.836	875.004	1.93552	0.836111	0.0947976	0.103651	174.823	1.83209
Eaton Wash	EA43	400352	3.78617e+06	8042.14	8037.72	871.228	867.168	1.93719	0.832345	0.1131	0.207315	37.799	4.06049
Eaton Wash	EA44	400338	3.78618e+06	8019.82	8013.41	863.61	850.851	1.93825	0.830036	0.198759	0.671104	24.3137	12.7593
Eaton Wash	EA45	400282	3.78617e+06	7951.3	7949.3	843.72	841.87	1.94799	0.822943	0.114798	0.140072	64.1127	1.84998
Eaton Wash	EA46	400434	3.7858e+06	7808.42	7799	854.361	844.273	1.11863	0.956503	N.D.	N.D.	N.D.	N.D.
Eaton Wash	EA47	400430	3.78581e+06	7796.59	7794.17	843.293	841.362	1.11948	0.955054	0.406123	0.602991	4.82843	1.93103
El Prieto Canyon	EL1	394010	3.7876e+06	3742.48	3738.07	692.901	689.819	1.10639	0.977147	N.D.	N.D.	N.D.	N.D.
El Prieto Canyon	EL2	393968	3.78746e+06	3582.29	3578.46	669.553	665.727	1.22769	0.935321	0.130095	0.150944	159.61	3.82574
Fall Creek	F1	393154	3.79849e+06	2663.57	2659.57	1008.82	1002.98	2.1004	0.771055	N.D.	N.D.	N.D.	N.D.
Fall Creek	F2	393158	3.79848e+06	2656.75	2652.92	1001.74	991.792	2.10058	0.769078	0.435425	1.68011	6.65685	9.9527
Fall Creek	F3	393170	3.79845e+06	2613.05	2605.63	986.102	975.019	2.10262	0.756429	0.142709	0.354719	47.2843	11.0828
Fall Creek	F4	393100	3.79828e+06	2388.32	2385.32	953.609	951.467	2.36663	0.691375	0.0985259	0.106907	220.309	2.14209
Fall Creek	F5	392940	3.79747e+06	1198.74	1196.33	868.963	867.113	3.48933	0.347013	0.0695305	0.0709447	1189	1.84943
Fall Creek	F6	392922	3.79739e+06	1098.17	1095.34	861.745	860.071	3.51316	0.3179	0.0546886	0.069737	100.983	1.67432
Fall Creek	F7	392936	3.79737e+06	1077.2	1071.79	854.726	850.264	3.51374	0.311829	0.294653	0.416332	23.5563	4.46161
Fall Creek	F8	392948	3.79735e+06	1046.47	1033.23	848.562	831.919	3.51567	0.302934	0.067218	0.475801	38.5563	16.6436
Fall Creek	F9	392954	3.79733e+06	1028.4	1024.99	829.703	827.346	3.51631	0.297703	0.458899	0.554805	8.24264	2.3573
Fall Creek	F10	392960	3.79733e+06	1018.74	1013.92	824.928	818.404	3.51638	0.294908	0.387321	0.807654	11.0711	6.52368
Fall Creek	F11	392882	3.79677e+06	150.782	145.368	775.125	765.446	4.17004	0.0436485	0.0501414	0.0609727	868.548	9.67896
Fall Creek	F12	392884	3.79676e+06	130.468	122.64	763.358	752.525	4.17189	0.0377681	0.140173	0.568517	22.7279	10.8327
Fall Creek	F13	392890	3.79675e+06	113.983	109.983	751.996	745.684	4.17217	0.0329959	0.061156	0.540537	12.6569	6.31207
Fall Creek	F14	392894	3.79673e+06	88.669	79.8406	744.617	722.906	4.17394	0.025668	0.050051	0.755693	30.1421	21.7114
Falls Canyon	FA1	400724	3.78976e+06	1487.94	1485.52	1214.52	1212.9	1.2416	0.924509	N.D.	N.D.	N.D.	N.D.
Falls Canyon	FA2	400876	3.79028e+06	820.151	817.737	1129.17	1127.66	1.79804	0.50959	0.125848	0.127649	667.784	1.5061
Falls Canyon	FA3	400906	3.79029e+06	782.524	773.281	1124.15	1116.37	1.80209	0.486211	0.0997308	0.253991	44.4558	7.77954
Fern Canyon	FE1	392574	3.78792e+06	2210.56	2206.56	606.99	604.743	1.65837	0.829464	N.D.	N.D.	N.D.	N.D.
Fox Creek	FO1	391430	3.79742e+06	2495.45	2493.45	903.524	901.837	8.81635	0.331	N.D.	N.D.	N.D.	N.D.
Fox Creek	FO2	391464	3.79739e+06	2438.51	2431.68	896.514	884.232	8.82042	0.323447	0.096881	0.285015	61.7696	12.2825
Fox Creek	FO3	391482	3.79739e+06	2418.02	2416.02	883.622	881.064	8.82691	0.32073	0.0446517	0.202302	15.6569	2.55762
Fox Creek	FO4	391496	3.7974e+06	2396.95	2393.54	879.067	872.596	8.82973	0.317935	0.104756	0.376624	22.4853	6.4707
Fox Creek	FO5	391502	3.79742e+06	2374.05	2371.05	871.624	867.91	8.83309	0.314898	0.0498611	0.208405	22.4853	3.71448
Fox Creek	FO6	391560	3.79746e+06	2287.31	2275.83	861.695	833.657	8.84164	0.303392	0.074218	0.359705	95.2254	28.038
Fox Creek	FO7	391580	3.79747e+06	2259.76	2254.51	832.966	826.726	8.84273	0.299737	0.0429952	0.32516	21.3137	6.23938
Fox Creek	FO8	391596	3.79748e+06	2239.86	2236.44	825.885	822.863	8.8433	0.297098	0.0573712	0.213779	18.0711	3.02234
Fox Creek	FO9	391606	3.79748e+06	2226.37	2221.54	821.32	816.605	8.84597	0.295309	0.153263	0.420039	14.8995	4.71484
Fox Creek	FO10	391612	3.79749e+06	2220.13	2216.71	816.052	812.49	8.84603	0.294481	0.390929	0.852192	4.82843	3.56189
Fox Creek	FO11	391530	3.79651e+06	534.399	527.742	726.349	709.57	10.4595	0.0708834	0.0512036	0.0609366	1688.97	16.7795
Fusier Canyon	FU1	389098	3.79605e+06	3469.35	3465.94	925.545	922.627	1.16477	0.982921	N.D.	N.D.	N.D.	N.D.
Fusier Canyon	FU2	389096	3.79604e+06	3461.94	3459.94	921.988	920.426	1.16517	0.98082	0.159744	0.36673	6	1.5614
Fusier Canyon	FU3	388802	3.79552e+06	2555.19	2549.95	852.487	848.993	1.48574	0.723924	0.0750915	0.0784989	909.992	3.49432
Fusier Canyon	FU4	388794	3.79553e+06	2542.29	2536.05	848.516	843.222	1.48615	0.720269	0.0623516	0.415203	13.8995	5.2937
Fusier Canyon	FU5	388754	3.79552e+06	2468.69	2460.45	838.75	831.615	1.57443	0.699418	0.0663994	0.153536	75.598	7.13464
Fusier Canyon	FU6	388750	3.79551e+06	2459.45	2453.45	831.091	821.537	1.57459	0.696799	0.523438	1.43971	7	9.55457
Fusier Canyon	FU7	388748	3.7954e+06	2307.32	2303.5	810.982	807.764	1.593	0.6537	0.0722302	0.0918507	149.953	3.21869
Fusier Canyon	FU8	388820	3.79532e+06	2142.64	2139.64	798.483	795.648	1.6082	0.607043	0.0576953	0.0739442	163.853	2.83551
Fusier Canyon	FU9	388854	3.79524e+06	1988.2	1985.79	787.31	784.797	1.67341	0.563289	0.0550587	0.070525	153.853	2.51245
Fusier Canyon	FU10	388608	3.79513e+06	1343.24	1338.41	749.848	743.56	1.73012	0.380559	0.0543913	0.0636989	647.382	6.28815
Grizzly Creek	G1	389088	3.79277e+06	1129.94	1125.7	762.756	759.838	1.3117	0.962626	N.D.	N.D.	N.D.	N.D.
Grizzly Creek	G2	389010	3.7929e+06	961.703	959.288	744.757	742.455	1.7456	0.8193	0.0919616	0.104464	166.409	2.30255
Grizzly Creek	G3	388994	3.79291e+06	938.561	935.146	739.095	736.658	1.78025	0.799584	0.162082	0.240114	24.1421	2.43726
Grizzly Creek	G4	388964	3.79294e+06	888.105	886.105	733.091	731.405	1.79522	0.7566	0.0758125	0.1071	49.0416	1.68604
Grizzly Creek	G5	388948	3.79295e+06	864.791	861.963	728.875	727.238	1.79746	0.736738	0.118727	0.172625	24.1421	1.63702
Grizzly Creek	G6	388936	3.79297e+06	837.82	831.578	723.919	719.569	1.80066	0.713761	0.137484	0.252376	30.3848	4.34924
Grizzly Creek	G7	388886	3.793e+06	769.98	766.566	706.875	704.199	1.84082	0.655966	0.206083	0.236429	65.0122	2.67651
Grizzly Creek	G8	388666	3.79319e+06	384.718	380.718	661.243	658.495	1.98464	0.327751	0.112494	0.11845	385.848	2.74817
Grizzly Creek	G9	388654	3.7932e+06	369.233	359.161	654.81	639.229	1.98502	0.314559	0.320824	0.893728	21.5563	15.5807
Grizzly Creek	G10	388650	3.79324e+06	316.948	314.12	633.893	631.721	2.94119	0.270017	0.126426	0.166697	45.0416	2.17145
Grotto Creek	GR1	397048	3.79704e+06	122.569	120.154	952.492	950.443	1.40536	0.302752	N.D.	N.D.	N.D.	N.D.
Grotto Creek	GR2	397056	3.79706e+06	95.0122	85.3553	946.051	938.074	1.40641	0.234686	0.174673	0.355421	34.799	7.97662
Haines Canyon	H1	383686	3.7924e+06	1859.91	1857.08	850.546	846.576	2.28565	0.581127	N.D.	N.D.	N.D.	N.D.
Haines Canyon	H2	383518	3.79237e+06	1653.98	1650.57	829.289	825.072	2.32578	0.516786	0.0851172	0.104133	206.51	4.21747
Haines Canyon	H3	383196	3.7924e+06	1245.82	1243.82	782.657	780.249	2.47108	0.389257	0.104793	0.110198	406.747	2.40826
Haines Canyon	H4	382808	3.7919e+06	474.073	472.659	711.319	709.437	3.53004	0.148124	0.0895485	0.0918246	771.164	1.8819
Haines Canyon	H5	382804	3.79189e+06	460.759	459.345	707.959	706.001	3.53018	0.143964	0.124178	0.258087	13.3137	1.95844
Haines Canyon	H6	382722	3.79182e+06	340.877	338.463	699.723	697.61	3.60753	0.106507	0.0529918	0.06941	120.882	2.11261
Haines Canyon	H7	382710	3.79183e+06	324.563	322.563	695.815	693.679	3.60829	0.10141	0.12914	0.247289	15.8995	2.13678
Little Santa Anita Wash	LSA1	402858	3.78509e+06	6839.22	6835.39	974.521	972.341	1.10736	0.986499	N.D.	N.D.	N.D.	N.D.
Little Santa Anita Wash	LSA2	403050	3.78446e+06	5913.23	5909.81	851.466	847.762	1.68328	0.852933	0.131079	0.134596	925.573	3.70343
Little Santa Anita Wash	LSA3	403050	3.78445e+06	5898.33	5895.91	846.492	844.565	1.68525	0.850784	0.110647	0.230001	13.8995	1.92609
Little Santa Anita Wash	LSA4	403490	3.78404e+06	5118.55	5115.14	766.51	764.347	3.09113	0.738308	0.10041	0.102741	780.779	2.16302
Little Santa Anita Wash	LSA5	403884	3.78355e+06	4225.59	4221.17	680.7	677.053	4.74054	0.609505	0.0940337	0.0976483	893.963	3.64642
Little Santa Anita Wash	LSA6	403882	3.78349e+06	4149.47	4147.06	670.588	668.393	4.75565	0.598527	0.0901799	0.116853	74.1127	2.19452
Little Santa Anita Wash	LSA7	403610	3.78299e+06	3126.87	3124.04	577.786	575.998	5.38804	0.451025	0.0888143	0.0903163	1023.02	1.78772
Little Santa Anita Wash	LSA8	403680	3.78295e+06	3004.3	2996.89	563.678	556.328	5.49382	0.433346	0.102892	0.154692	127.154	7.34943
Little Santa Anita Wash	LSA9	403680	3.78292e+06	2974.75	2970.92	552.499	548.191	5.49466	0.429082	0.172949	0.313317	25.9706	4.30756
Little Santa Anita Wash	LSA10	403698	3.7829e+06	2940.29	2938.29	545.745	544.226	5.49737	0.424112	0.0798765	0.121539	32.6274	1.5191
Little Santa Anita Wash	LSA11	403698	3.78288e+06	2923.63	2920.22	541.758	538.75	5.54363	0.42171	0.168382	0.30301	18.0711	3.00775
Little Santa Anita Wash	LSA12	403706	3.78285e+06	2887.49	2881.66	535.266	527.17	5.54478	0.416497	0.106443	0.30035	38.5563	8.09674
Little Santa Anita Wash	LSA13	403704	3.78283e+06	2861.42	2857.01	524.009	518.354	5.54957	0.412736	0.15612	0.35752	24.6569	5.65503
Little Santa Anita Wash	LSA14	403710	3.78276e+06	2780.24	2777.82	507.503	505.712	5.5785	0.401026	0.141348	0.159656	79.1838	1.79092
Little Santa Anita Wash	LSA15	403722	3.78272e+06	2729.95	2724.13	499.606	494.181	5.59568	0.393773	0.12755	0.214734	53.6985	5.42505
Little Santa Anita Wash	LSA16	403676	3.78268e+06	2660.7	2656.7	484.689	480.626	5.60266	0.383783	0.149662	0.201033	67.4264	4.06235
Little Santa Anita Wash	LSA17	403690	3.78258e+06	2542.72	2539.89	463.584	461.666	5.69762	0.366765	0.149517	0.16232	116.811	1.9184
Little Santa Anita Wash	LSA18	403700	3.78246e+06	2357.41	2353.99	442.137	437.599	5.71883	0.340036	0.10702	0.129461	185.894	4.53702
Little Santa Anita Wash	LSA19	403870	3.78243e+06	1938.2	1936.2	394.112	391.266	5.79981	0.27957	0.10459	0.110902	417.789	2.8461
Little Santa Anita Wash	LSA20	403908	3.78249e+06	1860.71	1854.88	384.447	379.346	5.82316	0.268391	0.0903169	0.146569	81.3259	5.10117
Little Santa Anita Wash	LSA21	403896	3.78218e+06	1369.69	1365.69	340.222	336.1	6.37215	0.197567	0.0806378	0.0884035	489.186	4.12146
Lukens Canyon	L1	386340	3.79426e+06	750.281	732.453	770.092	746.731	1.09152	0.970383	N.D.	N.D.	N.D.	N.D.
Lukens Canyon	L2	386346	3.79428e+06	725.21	718.796	745.167	732.667	1.09197	0.937957	0.215863	1.0298	13.6569	12.5004
Lukens Canyon	L3	386386	3.79432e+06	654.441	649.612	715.863	712.215	1.10817	0.846426	0.261116	0.295625	69.1838	3.64825
Lukens Canyon	L4	386390	3.79433e+06	646.784	644.37	710.633	708.708	1.10869	0.836523	0.559311	0.66886	5.24264	1.92462
Lukens Canyon	L5	386400	3.79434e+06	629.299	622.642	702.841	693.23	1.10913	0.813909	0.389326	0.712345	21.7279	9.61023
Lukens Canyon	L6	386436	3.79437e+06	573.186	568.943	684.576	681.633	1.12292	0.741335	0.174998	0.215965	53.6985	2.94232
Lukens Canyon	L7	386450	3.7944e+06	540.387	530.316	676.509	664.035	1.12391	0.698914	0.179429	0.45559	38.6274	12.4744
Lukens Canyon	L8	386462	3.79442e+06	517.831	513.416	661.205	656.219	1.20004	0.669741	0.226654	0.462476	16.8995	4.98578
Lukens Canyon	L9	386470	3.79443e+06	500.931	496.517	654.783	649.705	1.2035	0.647883	0.115087	0.385494	16.8995	5.07776
Lukens Canyon	L10	386476	3.79444e+06	486.446	480.617	647.279	636.468	1.20498	0.629149	0.240878	0.8325	15.8995	10.8104
Lukens Canyon	L11	386484	3.79446e+06	466.718	461.889	634.037	623.555	1.2093	0.603633	0.174914	0.68951	18.7279	10.4819
Millard Creek	M1	395836	3.788e+06	6630.67	6628.67	948.54	946.715	2.65331	0.835439	N.D.	N.D.	N.D.	N.D.
Millard Creek	M2	395980	3.78785e+06	6340.21	6337.79	917.515	915.367	2.78552	0.798841	0.101227	0.107772	290.877	2.14813
Millard Creek	M3	395962	3.78773e+06	6137.63	6134.63	889.247	886.459	2.8444	0.773317	0.130492	0.142283	203.167	2.78705
Millard Creek	M4	395964	3.7877e+06	6097.65	6094.83	882.569	880.817	2.96584	0.768281	0.105227	0.141774	39.799	1.75214
Millard Creek	M5	395660	3.78736e+06	5491.31	5488.31	801.742	799.471	3.43438	0.691884	0.131026	0.134121	606.512	2.27032
Millard Creek	M6	395670	3.78735e+06	5475.24	5473.24	797.558	796.001	3.43695	0.68986	0.146388	0.230273	15.0711	1.55701
Millard Creek	M7	395672	3.78734e+06	5458.76	5455.34	795.555	792.552	3.43772	0.687782	0.030793	0.192658	17.8995	3.00244
Millard Creek	M8	395666	3.78731e+06	5429.03	5425.03	789.92	786.428	3.43912	0.684037	0.100036	0.202032	30.3137	3.492
Millard Creek	M9	395662	3.78729e+06	5397.89	5394.89	778.91	776.9	3.48101	0.680113	0.276982	0.316097	30.1421	2.00995
Millard Creek	M10	395664	3.78728e+06	5390.06	5387.65	775.934	773.866	3.48804	0.679127	0.200091	0.418933	7.24264	2.06805
Millard Creek	M11	394834	3.78704e+06	3745.09	3742.67	647.459	645.086	5.06711	0.471867	0.0769576	0.0782868	1644.97	2.37238
Millard Creek	M12	394832	3.78704e+06	3741.26	3735.02	644.141	627.803	5.06713	0.471384	0.668437	2.25719	7.65685	16.3376
Pasadena Canyon	PA1	401056	3.78387e+06	2803.88	2801.88	683.145	681.022	1.3504	0.880897	N.D.	N.D.	N.D.	N.D.
Pasadena Canyon	PA2	401020	3.78382e+06	2726.73	2721.49	673.71	668.88	1.41203	0.856658	0.0972868	0.151016	80.397	4.82971
Pasadena Canyon	PA3	401012	3.78381e+06	2713.83	2704.83	666.988	654.371	1.41646	0.852605	0.247119	0.871073	16.6569	12.6172
Pasadena Canyon	PA4	401012	3.7838e+06	2699.41	2696.41	654.139	651.783	1.41683	0.848076	0.0428717	0.307562	8.41421	2.35577
Pasadena Canyon	PA5	401010	3.78379e+06	2691.59	2686.59	651.065	645.182	1.41698	0.845617	0.148643	0.671649	9.82843	5.88354
Pasadena Canyon	PA6	400946	3.78372e+06	2580.53	2578.53	635.604	633.187	1.54108	0.810727	0.0903081	0.111013	108.054	2.41785
Pasadena Canyon	PA7	400800	3.78352e+06	2263.64	2261.64	594.894	593.317	1.66267	0.71117	0.121607	0.125814	316.889	1.57635
Pasadena Canyon	PA8	400832	3.78349e+06	2211.7	2207.29	588.478	583.133	1.67294	0.694851	0.0969049	0.187377	54.3553	5.3454
Pasadena Canyon	PA9	400826	3.78343e+06	2059.92	2057.09	569.309	566.832	1.74938	0.647166	0.0938028	0.108531	150.196	2.47742
Pasadena Canyon	PA10	400826	3.78342e+06	2054.68	2049.43	565.776	561.394	1.75001	0.645519	0.437422	0.710188	7.65685	4.38177
Pasadena Canyon	PA11	400806	3.78334e+06	1953.11	1950.69	553.477	551.207	1.76035	0.613609	0.0821909	0.103172	98.7401	2.27008
Pasadena Canyon	PA12	400814	3.78331e+06	1918.97	1914.72	548.067	544.473	1.7817	0.602883	0.0989669	0.1872	35.9706	3.59369
Pasadena Canyon	PA13	400876	3.78329e+06	1831.95	1828.95	536.31	533.779	1.79599	0.575546	0.098625	0.124684	85.7696	2.53094
Pasadena Canyon	PA14	400898	3.78325e+06	1775.5	1772.5	528.818	524.853	1.88122	0.557809	0.0927964	0.158097	56.4558	3.96497
Pasadena Canyon	PA15	400844	3.78322e+06	1682	1679.59	517.497	515.396	1.95636	0.528435	0.0812876	0.101784	92.9117	2.10059
Pasadena Canyon	PA16	400760	3.78319e+06	1558.05	1554.63	506.614	501.597	1.96677	0.489493	0.0722574	0.11044	124.953	5.01779
Pasadena Canyon	PA17	400734	3.78319e+06	1525.91	1522.49	499.076	493.847	1.98216	0.479395	0.0877372	0.241108	32.1421	5.22922
Pasadena Canyon	PA18	400712	3.78319e+06	1496.69	1494.28	488.408	485.502	1.99032	0.470217	0.2108	0.295778	28.2132	2.90643
Pasadena Canyon	PA19	400646	3.7831e+06	1353.91	1351.5	464.313	462.168	2.02874	0.425359	0.150951	0.163425	142.782	2.14548
Pasadena Canyon	PA20	400606	3.78304e+06	1264.76	1258.51	447.976	442.124	2.0436	0.397349	0.163609	0.215565	92.9828	5.85239
Pasadena Canyon	PA21	400568	3.78237e+06	462.032	459.617	380.009	378.358	2.20891	0.145157	0.0779869	0.079817	798.897	1.65033
Pipe Canyon	P1	381890	3.79515e+06	471.186	468.772	529.205	527.271	1.39255	0.334757	N.D.	N.D.	N.D.	N.D.
Pipe Canyon	P2	381886	3.79516e+06	464.943	460.529	526.218	521.488	1.39267	0.330322	0.275026	0.701591	8.24264	4.73004
Pipe Canyon	P3	381876	3.79525e+06	258.735	253.492	496.214	491.932	1.44303	0.18382	0.125245	0.142759	207.037	4.28275
Pipe Canyon	P4	381676	3.79529e+06	6.24264	2.41421	463.962	460.86	1.4803	0.00443513	0.113125	0.123754	251.078	3.10172
Rubio Canyon	R1	397160	3.78608e+06	1743.77	1741.77	798.609	796.841	1.31499	0.747997	N.D.	N.D.	N.D.	N.D.
Rubio Canyon	R2	397176	3.78604e+06	1691.66	1688.66	792.533	789.461	1.31854	0.725643	0.0859756	0.138959	53.1127	3.07202
Rubio Canyon	R3	397332	3.78596e+06	1446.18	1441.76	757.631	753.277	1.37489	0.620344	0.131265	0.146554	246.894	4.35419
Rubio Canyon	R4	397280	3.78591e+06	1354.68	1352.27	741.208	738.803	2.23418	0.581095	0.138592	0.161729	89.4975	2.40533
Rubio Canyon	R5	397274	3.7859e+06	1342.61	1340.2	736.889	735.306	2.23482	0.575917	0.198208	0.289646	12.0711	1.58228
Rubio Canyon	R6	397230	3.78583e+06	1242.53	1231.28	723.313	699.842	2.25492	0.532986	0.122793	0.325625	108.912	23.4713
Rubio Canyon	R7	397226	3.78581e+06	1220.04	1214.63	699.512	692.841	2.25669	0.523341	0.0293649	0.420313	16.6569	6.67096
Rubio Canyon	R8	397226	3.78579e+06	1195.73	1192.31	689.026	685.25	2.26352	0.512912	0.201828	0.340206	22.3137	3.77679
Rubio Canyon	R9	397180	3.78578e+06	1128.13	1123.3	676.534	671.64	2.26786	0.483915	0.135788	0.197207	69.0122	4.89429
Rubio Canyon	R10	397174	3.78577e+06	1117.89	1113.89	670.404	662.635	2.26966	0.479522	0.228304	0.956481	9.41421	7.76843
Rubio Canyon	R11	397152	3.78573e+06	1063.19	1059.19	653.279	644.94	2.27869	0.456059	0.184551	0.323519	54.6985	8.33954
Rubio Canyon	R12	397152	3.78572e+06	1051.36	1047.36	643.22	638.906	2.27885	0.450985	0.219685	0.510091	11.8284	4.31378
Rush Creek	RU1	403088	3.78937e+06	911.548	905.548	1063.9	1057.6	1.00158	0.984616	N.D.	N.D.	N.D.	N.D.
Rush Creek	RU2	403134	3.78941e+06	828.193	810.122	1047.25	1030.19	1.01428	0.894579	0.133784	0.287253	95.4264	17.0626
Santa Anita Wash	SA1	409398	3.78598e+06	4797.59	4794.18	1229.13	1226.44	1.01737	0.98494	N.D.	N.D.	N.D.	N.D.
Santa Anita Wash	SA2	409344	3.78588e+06	4658.71	4655.71	1204.01	1201.64	1.27411	0.956428	0.16557	0.179134	138.468	2.37488
Santa Anita Wash	SA3	409232	3.7859e+06	4519.07	4516.07	1176.29	1173.62	1.29274	0.92776	0.185521	0.200642	139.64	2.66809
Santa Anita Wash	SA4	409188	3.7859e+06	4469.85	4467.85	1164.33	1162.82	1.57613	0.917657	0.200925	0.223973	48.2132	1.51306
Santa Anita Wash	SA5	409096	3.78587e+06	4357.29	4351.04	1148.75	1141.93	1.62003	0.894546	0.127283	0.178867	116.811	6.82019
Santa Anita Wash	SA6	409068	3.78586e+06	4323.14	4320.14	1139.54	1137.08	1.63622	0.887537	0.085652	0.156833	30.8995	2.45642
Santa Anita Wash	SA7	408286	3.78572e+06	3167.04	3163.63	993.607	990.604	2.99445	0.650191	0.124424	0.126653	1156.51	3.0033
Santa Anita Wash	SA8	408062	3.78592e+06	2626.1	2623.1	927.161	924.848	3.30667	0.539136	0.118026	0.121651	540.529	2.31372
Santa Anita Wash	SA9	407298	3.78613e+06	1565.49	1562.07	821.183	818.151	4.1628	0.321393	0.0980173	0.100559	1061.03	3.03174
Santa Anita Wash	SA10	407218	3.78617e+06	1458.02	1454.19	801.644	798.934	4.18606	0.29933	0.158643	0.178135	107.882	2.71027
Santa Anita Wash	SA11	407200	3.78621e+06	1415.98	1402.08	795.046	770.512	4.19302	0.290699	0.101729	0.545389	52.1127	24.5343
Santa Anita Wash	SA12	407108	3.78614e+06	1274.37	1271.37	760.25	758.111	6.27773	0.261626	0.080357	0.0948751	130.711	2.13873
Santa Anita Wash	SA13	407046	3.78609e+06	1177.87	1175.45	743.829	742.291	6.37959	0.241815	0.152746	0.164941	95.9117	1.53839
Santa Anita Wash	SA14	407032	3.78608e+06	1156.14	1151.9	738.822	733.04	6.39025	0.237355	0.179619	0.392712	23.5563	5.78174
Santa Anita Wash	SA15	406686	3.78596e+06	630.281	625.453	678.128	674.138	6.82622	0.129396	0.105273	0.111886	526.446	3.9892
Santa Anita Wash	SA16	406684	3.78591e+06	568.512	564.683	671.449	668.84	6.88338	0.116715	0.0472375	0.0871914	60.7696	2.60883
Santa Anita Wash	SA17	406610	3.78581e+06	395.103	389.446	644.053	640.172	6.94044	0.0811142	0.146164	0.163592	175.238	3.88098
Santa Anita Wash	SA18	406398	3.78575e+06	91.397	87.397	613.247	610.059	7.01542	0.0187637	0.0903375	0.099697	302.049	3.18835
Santa Anita Wash	SA19	407584	3.78671e+06	2352.66	2350.66	976.114	974.291	1.39656	0.85575	N.D.	N.D.	N.D.	N.D.
Santa Anita Wash	SA20	407580	3.78667e+06	2311.27	2308.44	971.755	969.936	1.39842	0.840697	0.0644077	0.103179	42.2132	1.81885
Santa Anita Wash	SA21	407504	3.78661e+06	2162.8	2158.56	951.436	948.813	1.79969	0.786694	0.127028	0.140928	149.882	2.62225
Santa Anita Wash	SA22	407494	3.7866e+06	2150.32	2147.9	947.328	945.257	1.80006	0.782152	0.180211	0.333736	10.6569	2.07117
Santa Anita Wash	SA23	407394	3.78657e+06	1987.64	1979.39	926.252	917.632	1.84755	0.722979	0.118581	0.163937	168.51	8.6203
Santa Anita Wash	SA24	407292	3.78651e+06	1827.03	1824.03	899.831	895.495	1.88877	0.664559	0.116831	0.142479	155.368	4.33533
Santa Anita Wash	SA25	407274	3.78647e+06	1783.23	1780.4	888.104	886.33	1.89687	0.648627	0.181173	0.210078	43.6274	1.7735
Santa Anita Wash	SA26	407266	3.78646e+06	1767.33	1763.91	886.33	881.781	1.89817	0.642844	0	0.275959	16.4853	4.54926
Santa Anita Wash	SA27	407264	3.78646e+06	1761.08	1757.26	881.411	874.898	1.89965	0.640574	0.130856	1.03399	6.65685	6.513
Santa Anita Wash	SA28	407222	3.78638e+06	1644	1641.59	855.803	853.329	1.92141	0.597986	0.1686	0.186471	115.669	2.47418
Santa Anita Wash	SA29	407174	3.78637e+06	1587.2	1579.2	847.348	837.534	1.92446	0.577326	0.109979	0.253175	62.3848	9.81305
Santa Anita Wash	SA30	407158	3.78632e+06	1515.92	1511.09	827.353	823.641	2.03844	0.551397	0.160879	0.203973	68.1127	3.71204
Santa Anita Wash	SA31	407176	3.78628e+06	1471.7	1465.7	814.69	809.366	2.05096	0.535315	0.227289	0.314547	45.3848	5.32391
Santa Anita Wash	SA32	407170	3.78626e+06	1445.05	1441.63	805.22	801.007	2.05275	0.525619	0.200673	0.347259	24.0711	4.21362
Santa Anita Wash	SA33	407166	3.78623e+06	1413.91	1391.18	795.618	770.664	2.05482	0.514291	0.194334	0.601381	50.4558	24.9547
Silver Creek	SL1	388082	3.79291e+06	942.803	940.803	737.181	735.567	1.17257	0.991944	N.D.	N.D.	N.D.	N.D.
Silver Creek	SL2	388084	3.79292e+06	935.561	926.732	734.2	725.506	1.17277	0.984324	0.260852	0.715059	14.0711	8.69409
Silver Creek	SL3	388104	3.79297e+06	859.791	857.377	708.528	706.773	1.18052	0.904605	0.253625	0.270096	69.3553	1.75464
Silver Creek	SL4	388114	3.79298e+06	844.891	835.82	704.449	682.757	1.18759	0.888929	0.186103	1.11412	21.5563	21.6929
Silver Creek	SL5	388150	3.79302e+06	784.294	780.879	674.477	669.984	1.19396	0.825173	0.160676	0.232478	54.9411	4.49347
Silver Creek	SL6	388156	3.79302e+06	775.222	761.737	668.455	643.233	1.19433	0.815629	0.270269	1.39749	19.1421	25.222
Strayns Canyon	ST1	401538	3.7893e+06	1957.62	1954.2	1209.18	1206.43	1.16095	0.921133	N.D.	N.D.	N.D.	N.D.
Strayns Canyon	ST2	401542	3.78938e+06	1867.16	1864.75	1191.22	1189.67	1.19036	0.87857	0.174708	0.187283	89.4558	1.54663
Strayns Canyon	ST3	401762	3.78979e+06	1317.35	1313.94	1104.85	1102.32	1.37831	0.619862	0.154963	0.158585	550.813	2.52429
Strayns Canyon	ST4	401874	3.78986e+06	1133.77	1131.35	1078.99	1077.26	1.89132	0.533481	0.129511	0.137267	182.581	1.72876
Strayns Canyon	ST5	402024	3.78997e+06	917.318	915.318	1049.56	1047.98	2.15486	0.431633	0.129396	0.135546	216.037	1.58728
Strayns Canyon	ST6	402096	3.79001e+06	813.264	811.264	1035.47	1033.85	2.17752	0.382671	0.122572	0.135725	104.054	1.61377
Sutton Canyon	SU1	388004	3.79026e+06	2374.41	2371.99	876.242	874.078	1.03451	0.944183	N.D.	N.D.	N.D.	N.D.
Sutton Canyon	SU2	387960	3.79021e+06	2301.74	2298.91	863.217	861.42	1.06396	0.915286	0.154596	0.173213	73.0833	1.79779
Sutton Canyon	SU3	387886	3.79012e+06	2160.54	2157.13	843.379	840.161	1.22858	0.859139	0.130379	0.149936	141.782	3.2179
Sutton Canyon	SU4	387520	3.78993e+06	1516.97	1513.97	764.834	761.794	1.42755	0.603224	0.11767	0.121848	643.156	3.0401
Sutton Canyon	SU5	387522	3.78992e+06	1510.56	1505.73	760.484	756.844	1.42761	0.600673	0.383546	0.6005	8.24264	3.6402
Sutton Canyon	SU6	387510	3.78991e+06	1492.83	1489.42	753.316	748.512	1.44118	0.593624	0.273552	0.510768	16.3137	4.80383
Sutton Canyon	SU7	387490	3.7899e+06	1467.1	1465.1	745.782	744.129	1.44289	0.583393	0.122354	0.180238	24.3137	1.6521
Vogel Canyon	V1	388404	3.79718e+06	4237.79	4233.37	991.237	984.42	1.35974	0.999195	N.D.	N.D.	N.D.	N.D.
Vogel Canyon	V2	388126	3.79678e+06	3405.04	3396.21	907.965	892.608	1.61694	0.802848	0.0922989	0.10967	837.164	15.3572
Vogel Canyon	V3	388100	3.79679e+06	3365.48	3360.65	888.576	881.241	1.62082	0.793521	0.13121	0.319697	35.5563	7.33545
Vogel Canyon	V4	387852	3.79672e+06	3010.36	3003.95	852.772	846.563	2.22783	0.70979	0.081272	0.0972165	356.706	6.2088
Vogel Canyon	V5	387846	3.79671e+06	2997.29	2979.63	845.114	810.334	2.228	0.706708	0.21774	1.49006	24.3137	34.7794
Vogel Canyon	V6	387850	3.79661e+06	2867.41	2863.58	803.24	799.972	2.24511	0.676084	0.0632164	0.0892935	116.054	3.26837
Vogel Canyon	V7	387866	3.79661e+06	2849.51	2845.68	798.668	796.081	2.24574	0.671864	0.0926215	0.217377	17.8995	2.58765
Vogel Canyon	V8	387872	3.79661e+06	2841.85	2838.02	795.626	792.364	2.24643	0.670058	0.118645	0.485445	7.65685	3.26276
Vogel Canyon	V9	387762	3.7965e+06	2634.82	2620.75	774.109	745.246	2.29888	0.621243	0.0898322	0.216853	217.279	28.8631
Vogel Canyon	V10	387422	3.79545e+06	844.063	841.235	638.529	636.723	4.29188	0.199015	0.0600653	0.0609846	1779.51	1.80585
Vogel Canyon	V11	387448	3.79536e+06	720.595	711.352	630.295	619.006	4.34334	0.169903	0.053283	0.136409	129.882	11.2891
Ybarra Canyon	Y1	387008	3.79741e+06	3886.82	3881.57	942.256	934.855	1.02065	0.973397	N.D.	N.D.	N.D.	N.D.
Ybarra Canyon	Y2	387074	3.79735e+06	3784.59	3779.35	922.662	917.55	1.05904	0.947796	0.125726	0.169278	102.225	5.11121
Ybarra Canyon	Y3	387082	3.79732e+06	3750.03	3744.62	910.869	903.663	1.06393	0.939142	0.227944	0.399884	34.7279	7.20526
Ybarra Canyon	Y4	387092	3.79727e+06	3687.41	3684.41	896.028	893.654	1.06933	0.923458	0.133457	0.166228	60.2132	2.3736
Ybarra Canyon	Y5	387080	3.79719e+06	3585.81	3581.81	883.997	879.719	1.07878	0.898014	0.0979498	0.135819	102.598	4.2771
Ybarra Canyon	Y6	387050	3.79718e+06	3553.49	3551.08	877.301	875.637	1.08708	0.889922	0.0854122	0.13286	30.7279	1.66418
Ybarra Canyon	Y7	387028	3.79716e+06	3522.45	3520.45	869.105	867.216	1.09681	0.882148	0.228174	0.274938	30.6274	1.88861
Ybarra Canyon	Y8	386914	3.79702e+06	3302.93	3297.69	837.339	833.105	1.18861	0.827172	0.137354	0.153126	222.765	4.23346
Ybarra Canyon	Y9	386756	3.7968e+06	2993.87	2990.46	796.145	792.061	1.77964	0.749772	0.121654	0.133592	307.233	4.08313
Ybarra Canyon	Y10	386764	3.79678e+06	2969.39	2964.97	789.387	785.117	1.78538	0.74364	0.126916	0.27247	25.4853	4.26971
Ybarra Canyon	Y11	386770	3.79674e+06	2925.66	2922.66	777.915	775.949	1.79594	0.732689	0.183208	0.216672	42.3137	1.96564
Ybarra Canyon	Y12	386694	3.79668e+06	2812.02	2805.77	758.787	750.788	1.80652	0.70423	0.155114	0.215266	116.882	7.99896
Ybarra Canyon	Y13	386690	3.79667e+06	2797.95	2793.12	749.435	744.727	1.8109	0.700706	0.172874	0.478883	12.6569	4.70782
Ybarra Canyon	Y14	386624	3.79659e+06	2661.82	2657.82	726.746	722.801	3.36504	0.666615	0.136953	0.162065	135.296	3.94525
Ybarra Canyon	Y15	386594	3.79661e+06	2620.78	2617.95	718.534	716.499	3.36957	0.656337	0.115192	0.158051	39.8701	2.03461
Ybarra Canyon	Y16	386542	3.79656e+06	2524.45	2519.45	705.254	698.529	3.37805	0.632213	0.120275	0.182446	98.4975	6.72504
Ybarra Canyon	Y17	386504	3.79654e+06	2466.17	2463.17	693.847	691.628	3.38212	0.617617	0.0878685	0.122609	56.2843	2.21893
Ybarra Canyon	Y18	386282	3.79644e+06	2084.22	2074.81	664.249	651.105	3.70319	0.521963	0.0722497	0.104342	388.362	13.1434
Ybarra Canyon	Y19	387626	3.79716e+06	4236.18	4230.35	916.242	909.518	1.02179	0.998529	N.D.	N.D.	N.D.	N.D.
Ybarra Canyon	Y20	387272	3.797e+06	3729.38	3724.13	875.879	871.675	1.16343	0.879068	0.067147	0.074756	506.215	4.20386
Ybarra Canyon	Y21	387050	3.79689e+06	3381.36	3378.94	838.26	835.978	1.45665	0.797035	0.0974832	0.103412	345.191	2.2818
Ybarra Canyon	Y22	387024	3.79689e+06	3351.63	3345.39	832.492	823.479	1.46388	0.790028	0.12764	0.37248	33.5563	9.01276
Ybarra Canyon	Y23	387000	3.79687e+06	3316.42	3312.42	820.536	817.139	1.47848	0.781727	0.101594	0.192314	32.9706	3.39746
Ybarra Canyon	Y24	386948	3.79682e+06	3235.85	3232.43	811.683	808.22	1.49513	0.762736	0.071246	0.111504	79.9828	3.4632
Ybarra Canyon	Y25	386946	3.79681e+06	3230.02	3227.02	806.849	804.247	1.49526	0.761362	0.567926	0.733825	5.41421	2.60199
Ybarra Canyon	Y26	386858	3.79668e+06	3014.84	3012.43	788.397	786.616	1.52071	0.710642	0.0746999	0.0821633	214.593	1.78192
Ybarra Canyon	Y27	386856	3.79665e+06	2983.11	2980.28	783.567	781.888	1.52361	0.703163	0.103988	0.147082	32.1421	1.67926
Ybarra Canyon	Y28	386714	3.79659e+06	2791.63	2789.22	764.007	761.821	1.53991	0.658028	0.0947814	0.105028	191.066	2.18665
Ybarra Canyon	Y29	386666	3.79658e+06	2725.28	2707.03	754.736	731.979	1.5435	0.642387	0.110803	0.363115	82.1838	22.7573
Note: N.D. stands for No Data
*XL is the horizontal distance of the waterfall lip from the outlet.
**XB is the horizontal distance of the waterfall base from the outlet.
#ZL is the elevation of the waterfall lip.
##ZB is the elevation of the waterfall base.
###Non-dimensional distance of waterfalls calculated as the distance from the outlet divided by the total length of stream.
*#SR is the slope of the river excluding relief from waterfalls measured for the reach above each waterfall unit.
**#SU is the waterfall unit slope measured from the base of the upstream waterfall to the base of the downstream waterfall.
+LU is the waterfall unit length measured as the horizontal distance from the base of the upstream waterfall to the base of the downstream waterfall.
++Hwf is the height of the waterfall step measured from lip to base.

## Sheet: G49320
Groh, E.L., and Scheingross, J.S., 2021, Morphologic signatures of autogenic waterfalls: A case study in the San Gabriel Mountains, California: Geology, https://doi.org/10.1130/G49320.1
